# Supplementary material for: Epidemiology and Genetic Diversity of Spirometra Tapeworm Isolates from Snakes in Hunan Province, China
Source: MDPI journal article supplement (doi:10.3390/ani12091216), 2022-05-09
Supplement: s1 [file s1]

**Table S1.** Primers used to amplify the sequences studied.

| Gene        | Name  | Sequence (5'–3')          | References |
|-------------|-------|---------------------------|------------|
| <i>cox1</i> | cox1F | TAGACTAAGTGTTTTCAAAACACTA | [37]       |
|             | cox1R | ATAGCATGATGCAAAAGG        |            |
| <i>cytb</i> | cobF  | TGATAGGTTATTTAAACTGGC     | [37]       |
|             | cobR  | TCAACAGTTGAAACAACCA       |            |
