# Supplementary material for: Epidemiology and Genetic Diversity of Spirometra Tapeworm Isolates from Snakes in Hunan Province, China
Source: MDPI journal article supplement (doi:10.3390/ani12091216), 2022-05-09
Supplement: s1 [file s1]

**Table S2.** *Spirometra* isolates included in the molecular analysis.

| Country of origin    | Host                    | Location            | Sample codes | References |
|----------------------|-------------------------|---------------------|--------------|------------|
| China                |                         |                     |              |            |
| Yiyang City, Hunan   | <i>Zaocys dhumnades</i> | 112°46' E, 28°59' N | HuN-YiY1     | This study |
|                      | <i>Z. dhumnades</i>     | 112°46' E, 28°59' N | HuN-YiY2     | This study |
|                      | <i>Z. dhumnades</i>     | 112°46' E, 28°59' N | HuN-YiY3     | This study |
|                      | <i>Elaphe carinata</i>  | 112°46' E, 28°59' N | HuN-YiY4     | This study |
|                      | <i>E. carinata</i>      | 112°46' E, 28°59' N | HuN-YiY5     | This study |
| Changde City, Hunan  | <i>Z. dhumnades</i>     | 111°96' E, 28°77' N | HuN-CD2      | This study |
|                      | <i>Z. dhumnades</i>     | 111°96' E, 28°77' N | HuN-CD3      | This study |
|                      | <i>E. carinata</i>      | 111°96' E, 28°77' N | HuN-CD4      | This study |
|                      | <i>E. carinata</i>      | 111°96' E, 28°77' N | HuN-CD5      | This study |
| Yongzhou City, Hunan | <i>Z. dhumnades</i>     | 112°13' E, 25°67' N | HuN-YZ1      | This study |
|                      | <i>Z. dhumnades</i>     | 112°13' E, 25°67' N | HuN-YZ2      | This study |
|                      | <i>Z. dhumnades</i>     | 112°13' E, 25°67' N | HuN-YZ3      | This study |
| Hengyang City, Hunan | <i>Z. dhumnades</i>     | 112°85' E, 27°24' N | HuN-HY1      | This study |
|                      | <i>Z. dhumnades</i>     | 112°85' E, 27°24' N | HuN-HY2      | This study |
|                      | <i>Z. dhumnades</i>     | 112°85' E, 27°24' N | HuN-HY3      | This study |
|                      | <i>E. carinata</i>      | 112°85' E, 27°24' N | HuN-HY4      | This study |
|                      | <i>E. carinata</i>      | 112°85' E, 27°24' N | HuN-HY5      | This study |
| Xiangtan City, Hunan | <i>Z. dhumnades</i>     | 112°75' E, 27°59' N | HuN-XT1      | This study |
|                      | <i>Z. dhumnades</i>     | 112°75' E, 27°59' N | HuN-XT2      | This study |
|                      | <i>Z. dhumnades</i>     | 112°75' E, 27°59' N | HuN-XT3      | This study |
|                      | <i>E. carinata</i>      | 112°75' E, 27°59' N | HuN-XT4      | This study |
|                      | <i>E. carinata</i>      | 112°75' E, 27°59' N | HuN-XT5      | This study |
| Shaoyang City, Hunan | <i>Z. dhumnades</i>     | 110°73' E, 27°25' N | HuN-SY1      | This study |

|                      |                                 |                     |         |            |
|----------------------|---------------------------------|---------------------|---------|------------|
|                      | <i>Z. dhumnades</i>             | 110°73' E, 27°25' N | HuN-SY2 | This study |
|                      | <i>Z. dhumnades</i>             | 110°73' E, 27°25' N | HuN-SY3 | This study |
|                      | <i>E. carinata</i>              | 110°73' E, 27°25' N | HuN-SY4 | This study |
|                      | <i>E. carinata</i>              | 110°73' E, 27°25' N | HuN-SY5 | This study |
| Zhuzhou City, Hunan  | <i>Z. dhumnades</i>             | 113°43' E, 26°61' N | HuN-ZZ1 | This study |
|                      | <i>Z. dhumnades</i>             | 113°43' E, 26°61' N | HuN-ZZ2 | This study |
|                      | <i>Z. dhumnades</i>             | 113°43' E, 26°61' N | HuN-ZZ3 | This study |
|                      | <i>Elaphe. taeniura</i>         | 113°43' E, 26°61' N | HuN-ZZ4 | This study |
|                      | <i>E. taeniura</i>              | 113°43' E, 26°61' N | HuN-ZZ5 | This study |
| Changsha City, Hunan | <i>Z. dhumnades</i>             | 113°13' E, 28°19' N | HuN-CS1 | This study |
|                      | <i>Z. dhumnades</i>             | 113°13' E, 28°19' N | HuN-CS2 | This study |
|                      | <i>Z. dhumnades</i>             | 113°13' E, 28°19' N | HuN-CS3 | This study |
|                      | <i>White Tiger</i>              | 113°01' E, 28°04' N | HuN-BT1 | This study |
|                      | <i>White Tiger</i>              | 113°01' E, 28°04' N | HuN-BT2 | This study |
|                      | <i>White Tiger</i>              | 113°01' E, 28°04' N | HuN-BT3 | This study |
|                      | <i>Panthera tigris</i>          | 113°01' E, 28°04' N | HuN-DT1 | This study |
|                      | <i>Panthera tigris</i>          | 113°01' E, 28°04' N | HuN-DT2 | This study |
|                      | <i>Panthera tigris</i>          | 113°01' E, 28°04' N | HuN-DT3 | This study |
|                      | <i>Prionailurus bengalensis</i> | 113°01' E, 28°04' N | HuN-Li1 | This study |
|                      | <i>P. bengalensis</i>           | 113°01' E, 28°04' N | HuN-Li2 | This study |
|                      | <i>P. bengalensis</i>           | 113°01' E, 28°04' N | HuN-Li3 | This study |
|                      | <i>Cat</i>                      | 113°01' E, 28°04' N | HuN-C1  | This study |
|                      | <i>Cat</i>                      | 113°01' E, 28°04' N | HuN-C2  | This study |
|                      | <i>Cat</i>                      | 113°01' E, 28°04' N | HuN-C3  | This study |
| Loudi City, Hunan    | <i>E. carinata</i>              | 112°12' E, 27°32' N | HuN-LD1 | This study |
|                      | <i>E. carinata</i>              | 112°12' E, 27°32' N | HuN-LD2 | This study |
|                      | <i>E. carinata</i>              | 112°12' E, 27°32' N | HuN-LD3 | This study |
| Chenzhou City, Hunan | <i>Z. dhumnades</i>             | 113°29' E, 26°48' N | HuN-CZ1 | This study |

|                         |                         |                     |          |            |
|-------------------------|-------------------------|---------------------|----------|------------|
|                         | <i>Z. dhumnades</i>     | 13°29' E, 26°48' N  | HuN-CZ2  | This study |
|                         | <i>Z. dhumnades</i>     | 13°29' E, 26°48' N  | HuN-CZ3  | This study |
| Huaihua City, Hunan     | <i>Z. dhumnades</i>     | 110°86' E, 28°88' N | HuN-HH1  | This study |
|                         | <i>Z. dhumnades</i>     | 110°86' E, 28°88' N | HuN-HH2  | This study |
|                         | <i>Z. dhumnades</i>     | 110°86' E, 28°88' N | HuN-HH3  | This study |
| Zhangjiajie City, Hunan | <i>Z. dhumnades</i>     | 110°83' E, 29°14' N | HuN-ZZJ1 | This study |
|                         | <i>Z. dhumnades</i>     | 110°83' E, 29°14' N | HuN-ZZJ2 | This study |
|                         | <i>Z. dhumnades</i>     | 110°83' E, 29°14' N | HuN-ZZJ3 | This study |
| Yueyang City, Hunan     | <i>Z. dhumnades</i>     | 113°72' E, 28°75' N | HuN-YuY1 | This study |
|                         | <i>Z. dhumnades</i>     | 113°72' E, 28°75' N | HuN-YuY2 | This study |
|                         | <i>Z. dhumnades</i>     | 113°72' E, 28°75' N | HuN-YuY3 | This study |
|                         | <i>E. taeniura</i>      | 113°72' E, 28°75' N | HuN-YuY4 | This study |
|                         | <i>E. taeniura</i>      | 113°72' E, 28°75' N | HuN-YuY5 | This study |
| Xiangxi City, Hunan     | <i>Z. dhumnades</i>     | 109°54' E, 29°09' N | HuN-XX1  | This study |
|                         | <i>Z. dhumnades</i>     | 109°54' E, 29°09' N | HuN-XX2  | This study |
|                         | <i>Z. dhumnades</i>     | 109°54' E, 29°09' N | HuN-XX3  | This study |
| Guilin City, Guangxi    | <i>R. rugulosa</i>      | 110°2' E, 25°23' N  | GX-GL-1  | [13]       |
|                         | <i>R. rugulosa</i>      | 110°2' E, 25°23' N  | GX-GL-2  | [13]       |
|                         | <i>R. rugulosa</i>      | 110°2' E, 25°23' N  | GX-GL-3  | [13]       |
| Nanning City, Guangxi   | <i>E. chinensis</i>     | 108°48'E, 22°75'N   | GX-NN-1  | [13]       |
|                         | <i>E. chinensis</i>     | 108°48'E, 22°75'N   | GX-NN-2  | [13]       |
|                         | <i>R. rugulosa</i>      | 108°48'E, 22°75'N   | GX-NN-3  | [13]       |
|                         | <i>R. rugulosa</i>      | 108°48'E, 22°75'N   | GX-NN-4  | [13]       |
|                         | <i>R. nigromaculata</i> | 108°48'E, 22°75'N   | GX-NN-7  | [13]       |
|                         |                         |                     |          |            |
| Yunlin city, Guangxi    | <i>R. rugulosa</i>      | 110°27'E, 22°33'N   | GX-YL-1  | [13]       |
|                         | <i>R. rugulosa</i>      | 110°27'E, 22°33'N   | GX-YL-2  | [13]       |
|                         | <i>R. nigromaculata</i> | 110°27'E, 22°33'N   | GX-YL-5  | [13]       |
|                         | <i>R. nigromaculata</i> | 110°27'E, 22°33'N   | GX-YL-6  | [13]       |
| Haikou city, Hainan     | <i>R. rugulosa</i>      | 110°32'E, 20°03'N   | HN-HK-1  | [13]       |
|                         | <i>R. rugulosa</i>      | 110°32'E, 20°03'N   | HN-HK-2  | [13]       |
|                         | <i>R. nigromaculata</i> | 110°32'E, 20°03'N   | HN-HK-4  | [13]       |

|                               |                                 |                     |          |      |
|-------------------------------|---------------------------------|---------------------|----------|------|
| Wuzhishan city, Hainan        | <i>R. rugulosa</i>              | 110°4'E, 18°8'N     | HN-WZS-1 | [13] |
|                               | <i>R. rugulosa</i>              | 110°4'E, 18°8'N     | HN-WZS-3 | [13] |
|                               | <i>R. nigromaculata</i>         | 110°4'E, 18°8'N     | HN-WZS-4 | [13] |
|                               | <i>R. nigromaculata</i>         | 110°4'E, 18°8'N     | HN-WZS-6 | [13] |
| Guiyang city, Guizhou         | <i>Enhydriis chinensis</i>      | 106°63'E, 26°65'N   | GZ-GY-1  | [13] |
|                               | <i>R. nigromaculata</i>         | 106°63'E, 26°65'N   | GZ-GY-4  | [13] |
| Anshun city, Guizhou          | <i>R. nigromaculata</i>         | 105°95'E, 26°25'N   | GZ-AS-1  | [13] |
| Jishou city, Hunan            | <i>R. nigromaculata</i>         | 109°73'E, 28°32'N   | HuN-JS-4 | [13] |
|                               | <i>R. nigromaculata</i>         | 109°73'E, 28°32'N   | HuN-JS-5 | [13] |
|                               | <i>R. nigromaculata</i>         | 109°73'E, 28°32'N   | HuN-JS-6 | [13] |
| Changsha city, Hunan          | <i>R. nigromaculata</i>         | 112°93'E, 28°23'N   | HuN-CS-2 | [13] |
| Guangan city, Sichuan         | <i>R. nigromaculata</i>         | 106°11'E, 30°15'N   | SC-GA-1  | [36] |
|                               | <i>R. nigromaculata</i>         | 106°11'E, 30°15'N   | SC-GA-2  | [36] |
|                               | <i>R. nigromaculata</i>         | 106°11'E, 30°15'N   | SC-GA-3  | [36] |
|                               | <i>R. nigromaculata</i>         | 106°11'E, 30°15'N   | SC-GA-5  | [36] |
| Luzhou city, Sichuan          | <i>R. nigromaculata</i>         | 105°55'E, 28°55'N   | SC-LZ-1  | [36] |
|                               | <i>R. nigromaculata</i>         | 105°55'E, 28°55'N   | SC-LZ-2  | [36] |
|                               | <i>R. nigromaculata</i>         | 105°55'E, 28°55'N   | SC-LZ-4  | [36] |
|                               | <i>R. nigromaculata</i>         | 105°55'E, 28°55'N   | SC-LZ-5  | [36] |
| Mianyang city, Sichuan        | <i>R. nigromaculata</i>         | 104°35'E, 31°55'N   | SC-MY-1  | [36] |
| Nanchong city, Sichuan        | <i>R. nigromaculata</i>         | 105°50'E, 30°35'N   | SC-NC-1  | [36] |
|                               | <i>R. nigromaculata</i>         | 105°50'E, 30°35'N   | SC-NC-3  | [36] |
|                               | <i>R. nigromaculata</i>         | 105°50'E, 30°35'N   | SC-NC-4  | [36] |
|                               | <i>R. nigromaculata</i>         | 105°50'E, 30°35'N   | SC-NC-5  | [36] |
| Baoshan city, Yunnan          | <i>R. nigromaculata</i>         | 95°25'E, 100°02'N   | YN-BS-1  | [36] |
|                               | <i>R. nigromaculata</i>         | 95°25'E, 100°02'N   | YN-BS-3  | [36] |
|                               | <i>R. nigromaculata</i>         | 95°25'E, 100°02'N   | YN-BS-4  | [36] |
| Dehongzhou city, Yunnan       | <i>R. nigromaculata</i>         | 97°31'E, 98°43'N    | YN-DHZ-1 | [36] |
|                               | <i>R. nigromaculata</i>         | 97°31'E, 98°43'N    | YN-DHZ-2 | [36] |
| Kunming city, Yunnan          | <i>R. nigromaculata</i>         | 102°10'E, 24°23'N   | YN-KM-1  | [36] |
|                               | <i>R. nigromaculata</i>         | 102°10'E, 24°23'N   | YN-KM-3  | [36] |
| Liangping district, Chongqing | <i>R. nigromaculata</i>         | 107°80'E, 30°44'N   | CQ-LP-1  | [36] |
|                               | <i>R. nigromaculata</i>         | 107°80'E, 30°44'N   | CQ-LP-3  | [36] |
| Poland                        |                                 |                     |          |      |
| Białowieża Forest (BF)        | <i>Nyctereutes procyonoides</i> | 23°67' E, 52° 89' N | H01      | [15] |

|                        |                     |     |      |
|------------------------|---------------------|-----|------|
| <i>N. procyonoides</i> | 23°67' E, 52° 89' N | H02 | [15] |
| <i>N. procyonoides</i> | 23°67' E, 52° 89' N | H03 | [15] |
| <i>N. procyonoides</i> | 23°67' E, 52° 89' N | H04 | [15] |
| <i>N. procyonoides</i> | 23°67' E, 52° 89' N | H05 | [15] |
| <i>N. procyonoides</i> | 23°67' E, 52° 89' N | H06 | [15] |
| <i>N. procyonoides</i> | 23°67' E, 52° 89' N | H07 | [15] |
| <i>N. procyonoides</i> | 23°67' E, 52° 89' N | H10 | [15] |
| <i>N. procyonoides</i> | 23°67' E, 52° 89' N | H11 | [15] |
| <i>N. procyonoides</i> | 23°67' E, 52° 89' N | H12 | [15] |
| <i>Meles meles</i>     | 23°67' E, 52° 89' N | H13 | [15] |
| <i>M. meles</i>        | 23°67' E, 52° 89' N | H14 | [15] |
| <i>M. meles</i>        | 23°67' E, 52° 89' N | H15 | [15] |
| <i>M. meles</i>        | 23°67' E, 52° 89' N | H16 | [15] |
| <i>M. meles</i>        | 23°67' E, 52° 89' N | H18 | [15] |
| <i>N. procyonoides</i> | 23°67' E, 52° 89' N | H23 | [15] |
| <i>N. procyonoides</i> | 23°67' E, 52° 89' N | H24 | [15] |
| <i>N. procyonoides</i> | 23°67' E, 52° 89' N | H25 | [15] |
| <i>N. procyonoides</i> | 23°67' E, 52° 89' N | H26 | [15] |
| <i>N. procyonoides</i> | 23°67' E, 52° 89' N | H27 | [15] |
| <i>N. procyonoides</i> | 23°67' E, 52° 89' N | H28 | [15] |
| <i>N. procyonoides</i> | 23°67' E, 52° 89' N | H29 | [15] |
| <i>N. procyonoides</i> | 23°67' E, 52° 89' N | H30 | [15] |
| <i>N. procyonoides</i> | 23°67' E, 52° 89' N | H31 | [15] |
| <i>N. procyonoides</i> | 23°67' E, 52° 89' N | H32 | [15] |
| <i>N. procyonoides</i> | 23°67' E, 52° 89' N | H33 | [15] |
| <i>N. procyonoides</i> | 23°67' E, 52° 89' N | H34 | [15] |
| <i>N. procyonoides</i> | 23°67' E, 52° 89' N | H37 | [15] |
| <i>N. procyonoides</i> | 23°67' E, 52° 89' N | H38 | [15] |
| <i>N. procyonoides</i> | 23°67' E, 52° 89' N | H39 | [15] |
| <i>N. procyonoides</i> | 23°67' E, 52° 89' N | H40 | [15] |
| <i>N. procyonoides</i> | 23°67' E, 52° 89' N | H41 | [15] |
| <i>N. procyonoides</i> | 23°67' E, 52° 89' N | H42 | [15] |
| <i>N. procyonoides</i> | 23°67' E, 52° 89' N | H43 | [15] |
| <i>N. procyonoides</i> | 23°67' E, 52° 89' N | H44 | [15] |
| <i>N. procyonoides</i> | 23°67' E, 52° 89' N | H45 | [15] |

|                      |                        |                      |     |      |
|----------------------|------------------------|----------------------|-----|------|
|                      | <i>M. meles</i>        | 23°67' E, 52° 89' N  | H47 | [15] |
|                      | <i>M. meles</i>        | 23°67' E, 52° 89' N  | H49 | [15] |
|                      | <i>N. procyonoides</i> | 23°67' E, 52° 89' N  | H50 | [15] |
|                      | <i>M. meles</i>        | 22° 96' E, 53° 80' N | H58 | [15] |
|                      | <i>M. meles</i>        | 22° 96' E, 53° 80' N | H59 | [15] |
|                      | <i>N. procyonoides</i> | 23°67' E, 52° 89' N  | H61 | [15] |
|                      | <i>N. procyonoides</i> | 23°67' E, 52° 89' N  | H62 | [15] |
|                      | <i>N. procyonoides</i> | 23°67' E, 52° 89' N  | H63 | [15] |
|                      | <i>N. procyonoides</i> | 23°67' E, 52° 89' N  | H64 | [15] |
|                      | <i>N. procyonoides</i> | 23°67' E, 52° 89' N  | H65 | [15] |
|                      | <i>N. procyonoides</i> | 23°67' E, 52° 89' N  | H66 | [15] |
|                      | <i>N. procyonoides</i> | 23°67' E, 52° 89' N  | H67 | [15] |
|                      | <i>N. procyonoides</i> | 23°67' E, 52° 89' N  | H68 | [15] |
|                      | <i>N. procyonoides</i> | 23°67' E, 52° 89' N  | H69 | [15] |
|                      | <i>N. procyonoides</i> | 23°67' E, 52° 89' N  | H70 | [15] |
|                      | <i>N. procyonoides</i> | 23°67' E, 52° 89' N  | H71 | [15] |
|                      | <i>N. procyonoides</i> | 23°67' E, 52° 89' N  | H72 | [15] |
|                      | <i>N. procyonoides</i> | 23°67' E, 52° 89' N  | H73 | [15] |
|                      | <i>N. procyonoides</i> | 23°67' E, 52° 89' N  | H74 | [15] |
|                      | <i>N. procyonoides</i> | 23°67' E, 52° 89' N  | H75 | [15] |
|                      | <i>N. procyonoides</i> | 23°67' E, 52° 89' N  | H76 | [15] |
|                      | <i>N. procyonoides</i> | 23°67' E, 52° 89' N  | H77 | [15] |
|                      | <i>N. procyonoides</i> | 23°67' E, 52° 89' N  | H78 | [15] |
|                      | <i>N. procyonoides</i> | 23°67' E, 52° 89' N  | H79 | [15] |
| Augustów Forest (AF) | <i>N. procyonoides</i> | 22° 96' E, 53° 80' N | H08 | [15] |
|                      | <i>M. meles</i>        | 22° 96' E, 53° 80' N | H09 | [15] |
|                      | <i>N. procyonoides</i> | 22° 96' E, 53° 80' N | H17 | [15] |
|                      | <i>M. meles</i>        | 22° 96' E, 53° 80' N | H19 | [15] |
|                      | <i>M. meles</i>        | 22° 96' E, 53° 80' N | H20 | [15] |
|                      | <i>M. meles</i>        | 22° 96' E, 53° 80' N | H21 | [15] |
|                      | <i>N. procyonoides</i> | 22° 96' E, 53° 80' N | H22 | [15] |
|                      | <i>N. procyonoides</i> | 22° 96' E, 53° 80' N | H35 | [15] |
|                      | <i>N. procyonoides</i> | 22° 96' E, 53° 80' N | H36 | [15] |
|                      | <i>M. meles</i>        | 22° 96' E, 53° 80' N | H46 | [15] |
|                      | <i>M. meles</i>        | 22° 96' E, 53° 80' N | H48 | [15] |

|                              |                         |                      |     |      |
|------------------------------|-------------------------|----------------------|-----|------|
|                              | <i>M. meles</i>         | 22° 96' E, 53° 80' N | H51 | [15] |
|                              | <i>M. meles</i>         | 22° 96' E, 53° 80' N | H52 | [15] |
|                              | <i>M. meles</i>         | 22° 96' E, 53° 80' N | H53 | [15] |
|                              | <i>M. meles</i>         | 22° 96' E, 53° 80' N | H54 | [15] |
|                              | <i>M. meles</i>         | 22° 96' E, 53° 80' N | H55 | [15] |
|                              | <i>M. meles</i>         | 22° 96' E, 53° 80' N | H56 | [15] |
|                              | <i>M. meles</i>         | 22° 96' E, 53° 80' N | H57 | [15] |
|                              | <i>N. procyonoides</i>  | 22° 96' E, 53° 80' N | H80 | [15] |
|                              | <i>N. procyonoides</i>  | 22° 96' E, 53° 80' N | H81 | [15] |
|                              | <i>N. procyonoides</i>  | 23° 65' E, 53° 26' N | H60 | [15] |
| Knyszyn Forest (KF)          | <i>Mustela putorius</i> | 23° 65' E, 53° 26' N | H82 | [15] |
|                              | <i>M. putorius</i>      | 23° 65' E, 53° 26' N | H83 | [15] |
|                              | <i>N. procyonoides</i>  | 23° 65' E, 53° 26' N | H84 | [15] |
|                              | <i>N. procyonoides</i>  | 23° 65' E, 53° 26' N | H85 | [15] |
| Masurian Lake District (MLD) | <i>N. procyonoides</i>  | 23° 65' E, 53° 26' N | H85 | [15] |
